# Supplementary material for: Investigation of the anticancer efficacy and impact on energy metabolism of dual-core gold(i) complex BGC2a
Source: Royal Society of Chemistry journal article supplement (doi:10.1039/d5md00477b), 2025-01-01
Supplement: d5md00477b1.pdf [file d5md00477b1.pdf]

## Supporting Materials

### Investigation of the Anticancer Efficacy and Impact on Energy Metabolism of Dual-Core Gold(I) Complex BGC2a

Hai-Ling Gao,<sup>a</sup> Wenwen Ding,<sup>b</sup> Zhi-Xin Shen,<sup>c</sup> \* Qingbin Cui<sup>b,d</sup> \*

<sup>a</sup>Department of Histology and Embryology, Shandong Second Medical University, Weifang, Shandong 261053, China.

<sup>b</sup>Department of Experimental Research, Sun Yat-sen University Cancer Center, Guangzhou, China.

<sup>c</sup>Department of Thyroid and Breast Surgery, Affiliated Hospital of Shandong Second Medical University, Weifang, Shandong 261042, China.

<sup>d</sup>Department of Cell and Cancer Biology, University of Toledo College of Medicine and Life Sciences, Toledo, OH 43614, US.

Corresponding authors: [szx1758@163.com](mailto:szx1758@163.com) (Z.X.S.); [Qingbin.cui@utoledo.edu](mailto:Qingbin.cui@utoledo.edu) (Q.C.)

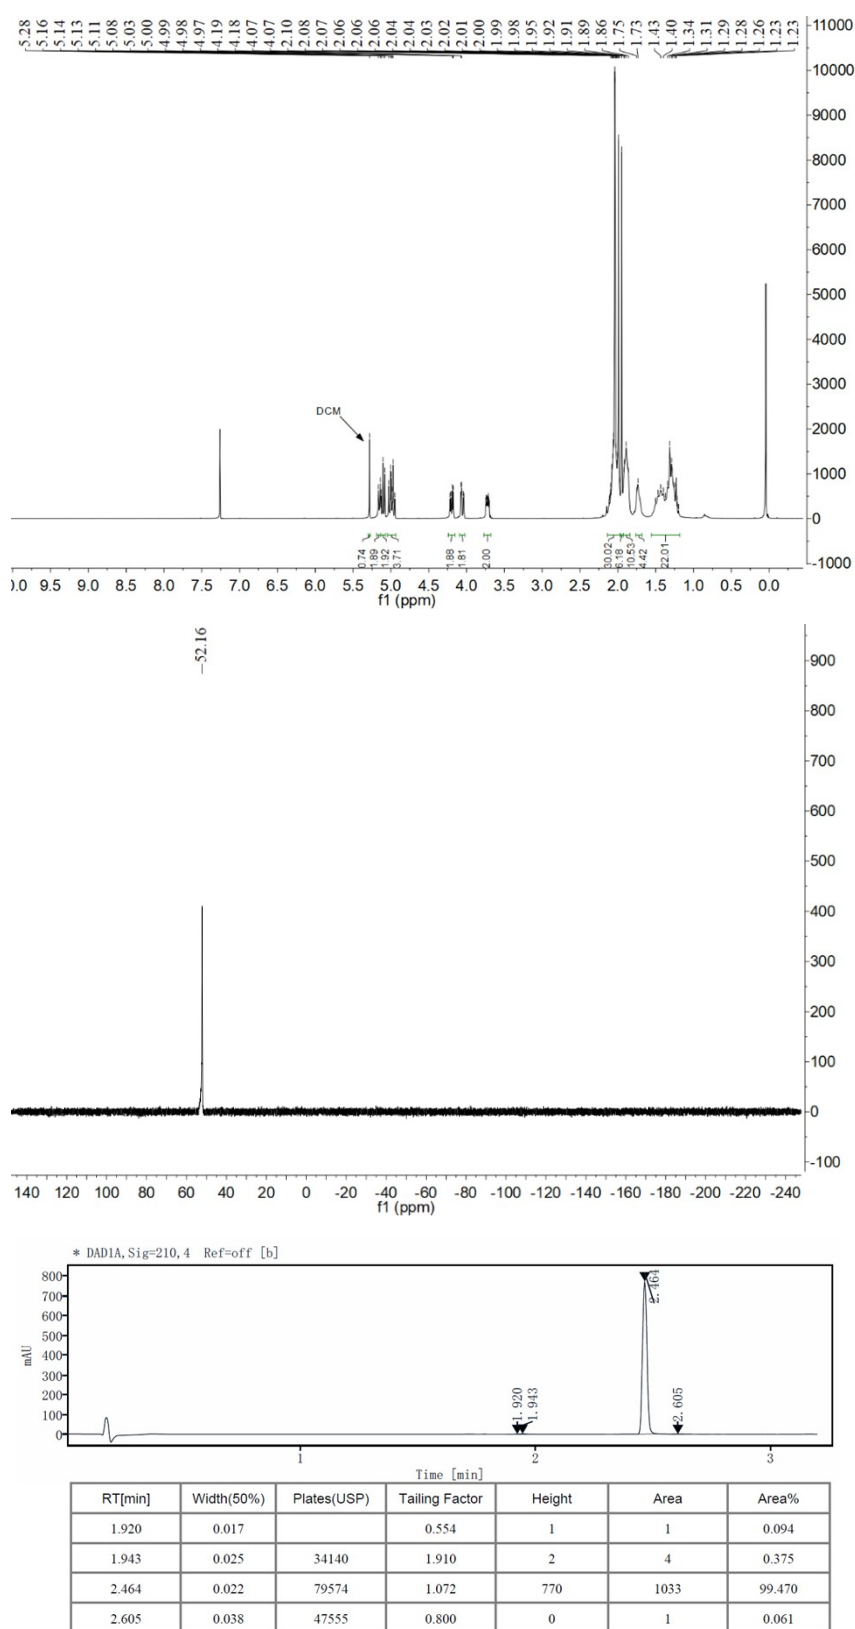

**Figure S1.**  $^1\text{H}$ - (upper) and  $^{31}\text{P}$ -NMR (middle) spectra of BGC2a and its HPLC trace (bottom).

Note: NMRs were recorded using  $\text{CDCl}_3$  as the solvent. HPLC was performed using an Agilent 1100 HPLC system with a Zorbax C18 column and a linear gradient mobile phase ranging from 5% to 95% acetonitrile containing 0.05% formic acid. Detection was at 210 nm.

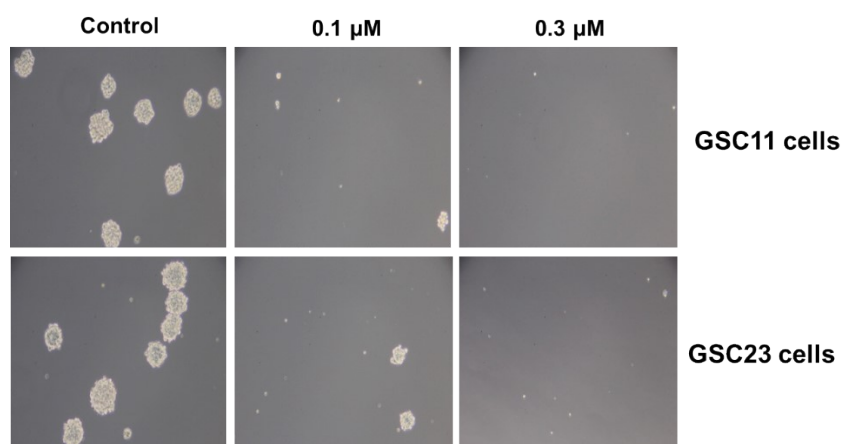

**Figure S2.** BGC2a (0.1 and 0.3  $\mu\text{M}$ ) was effective in reducing the spheroid formations by GSC11 and GSC23 cells.
