# Supplementary material for: Investigation of the anticancer efficacy and impact on energy metabolism of dual-core gold(i) complex BGC2a
Source: Royal Society of Chemistry journal article supplement (doi:10.1039/d5md00477b), 2025-01-01

Part 1 of the original image for Figure 8.

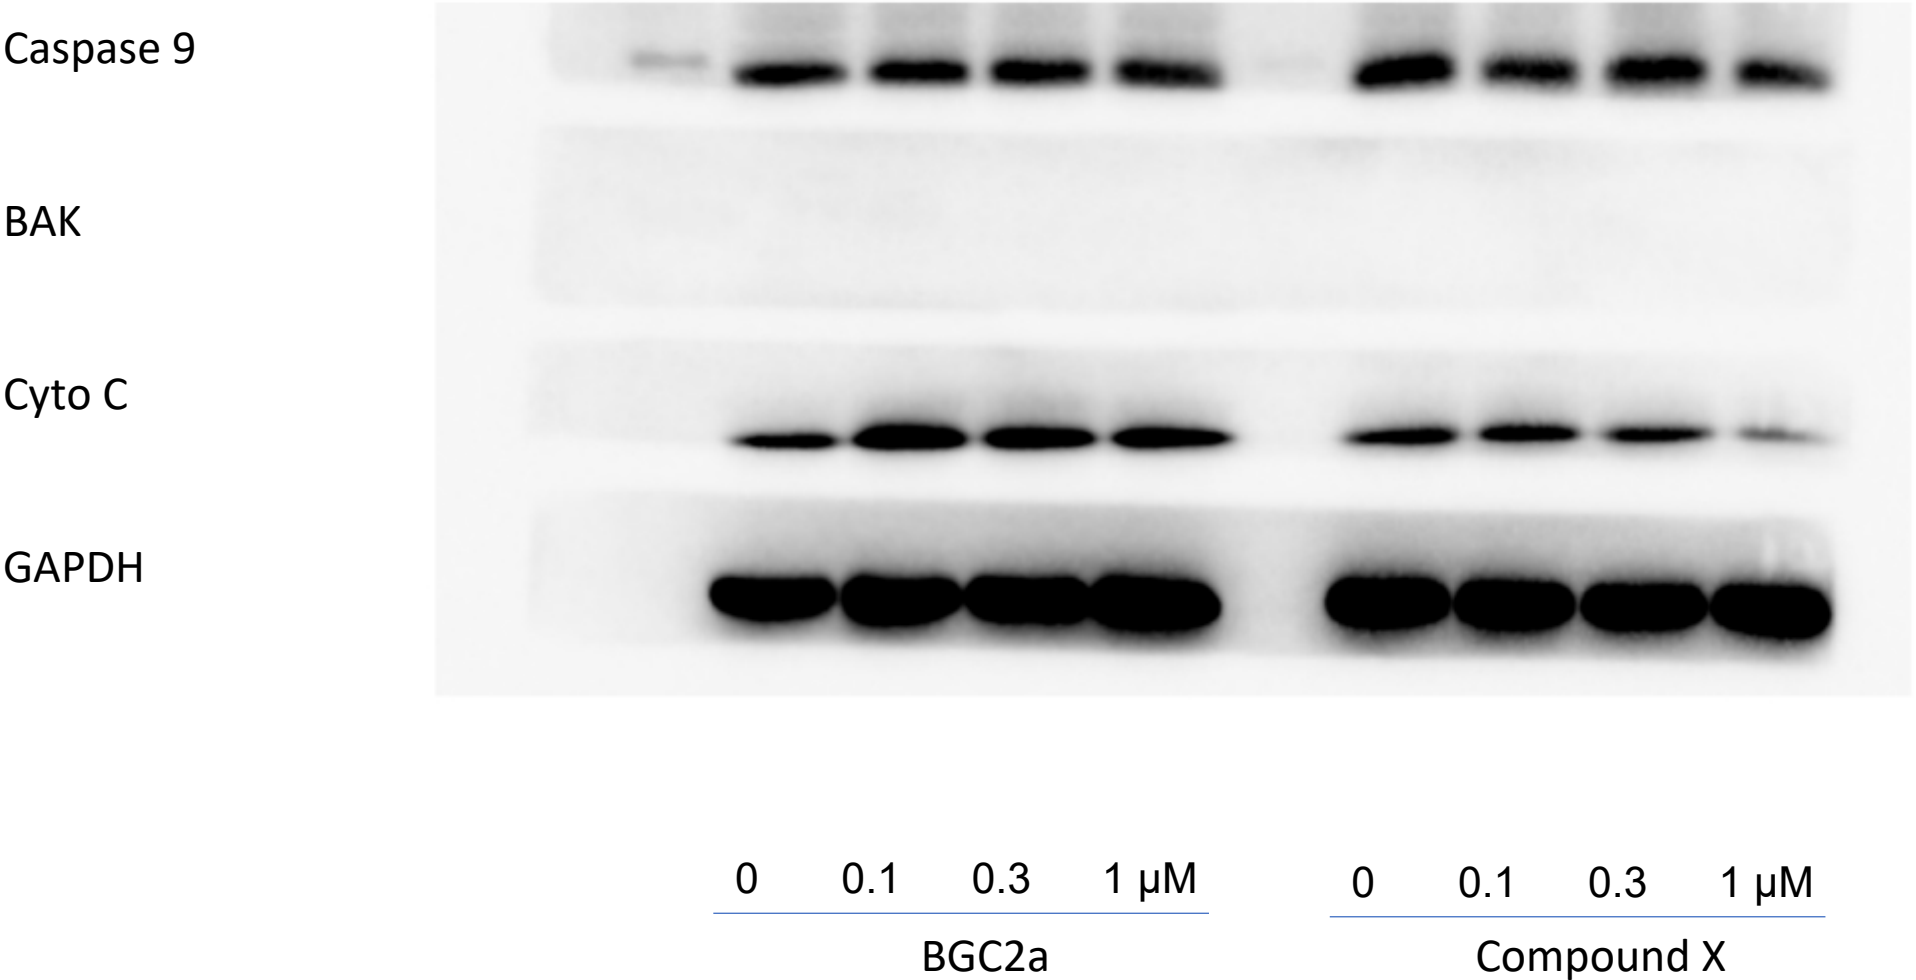

Part 2 of the original image for Figure 8.

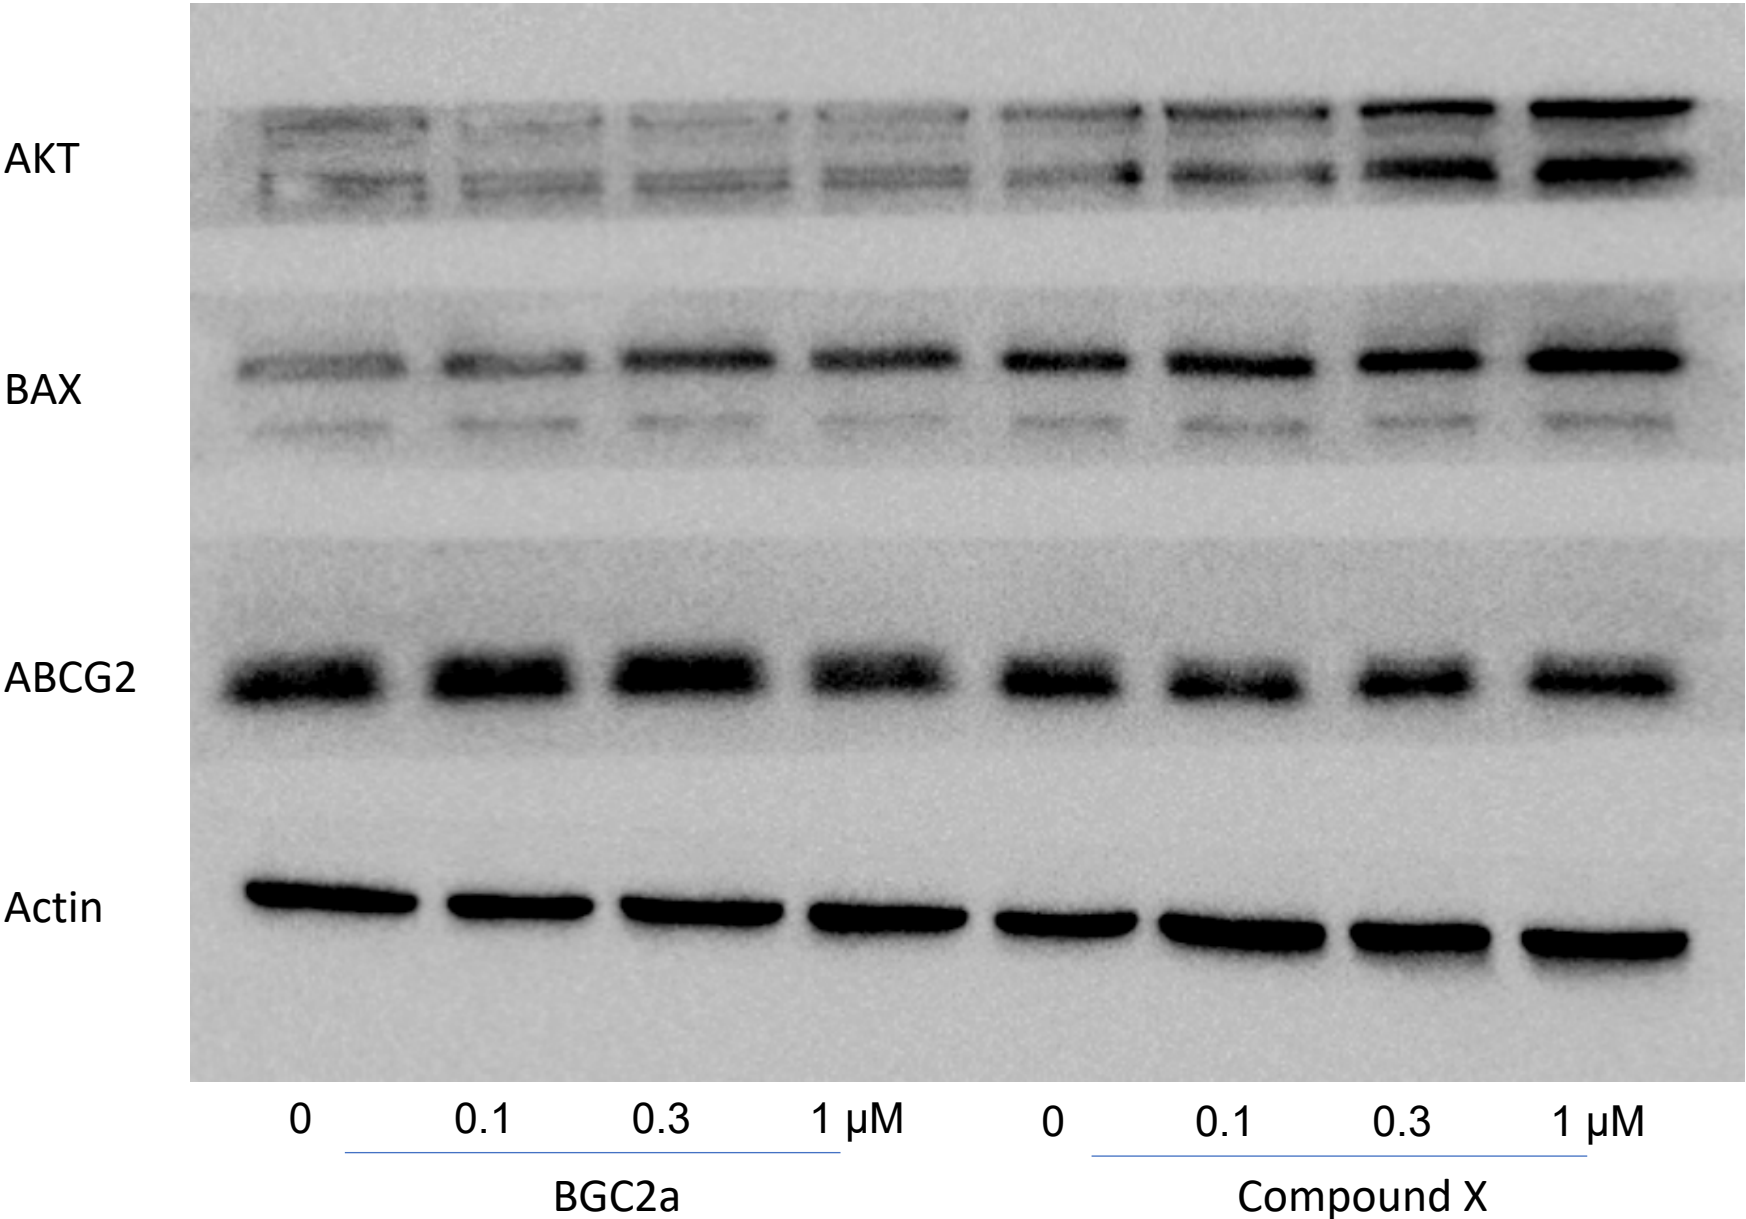

Deleted part 1 (PARP) of the original image for Figure 8.

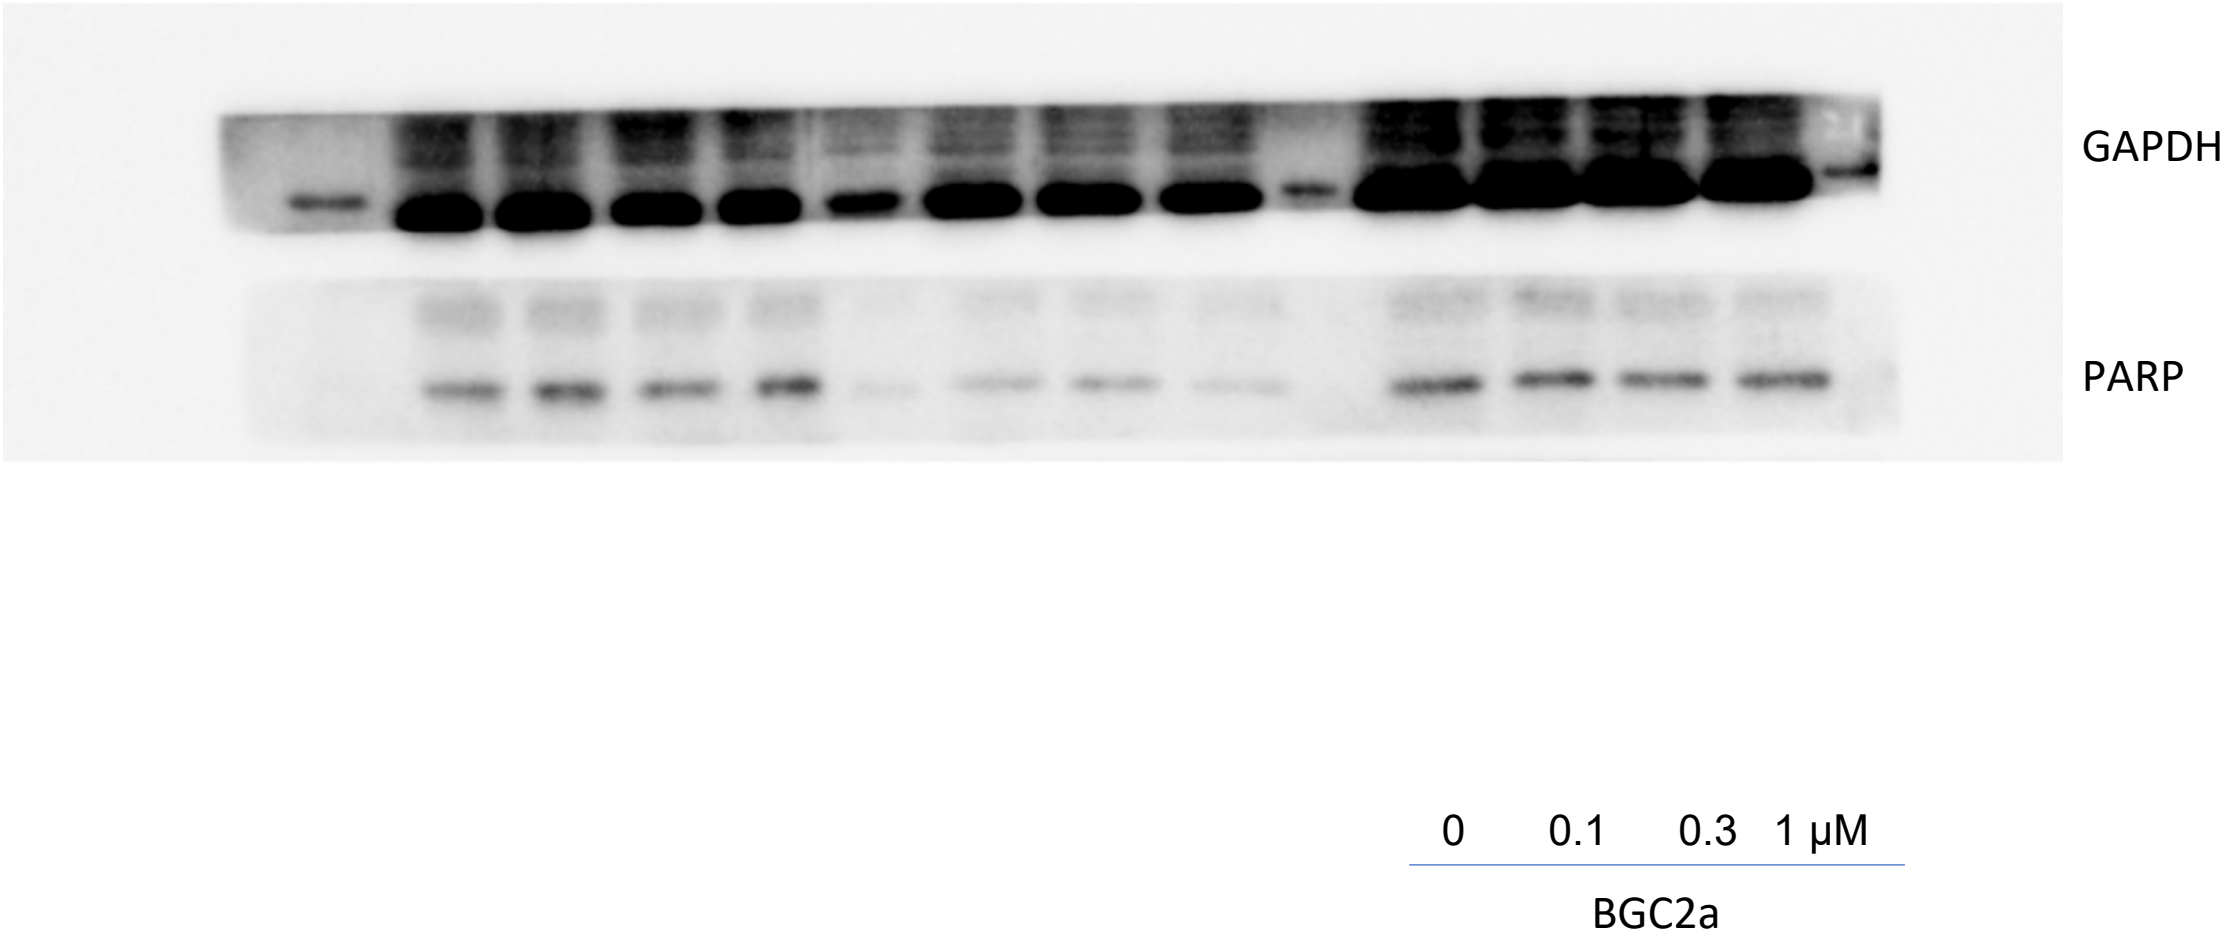

Deleted part 2 (BCL-2) of the original image for Figure 8.

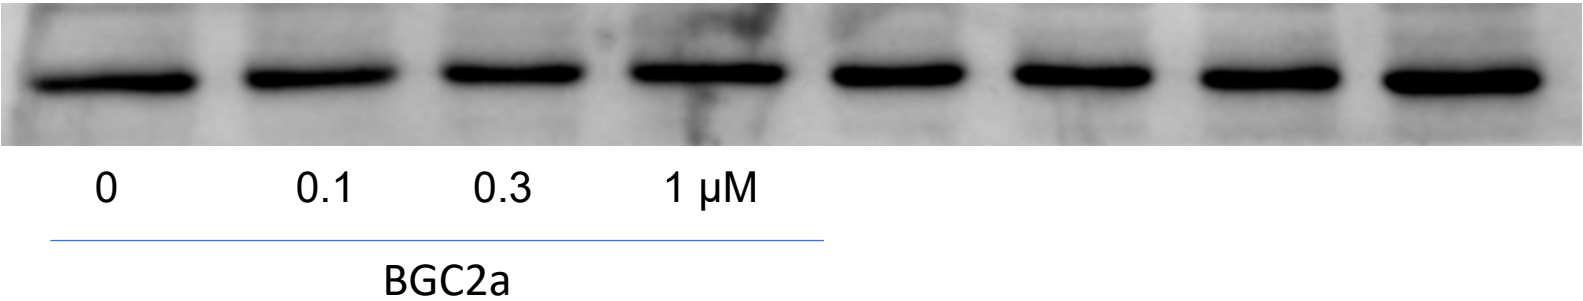

Supplement: d5md00477b2.pdf [file d5md00477b2.pdf]
